# Supplementary material for: The Corneal Ectasia Model of Rabbit: A Validity and Stability Study
Source: MDPI journal article supplement (doi:10.3390/bioengineering10040479), 2023-04-16
Supplement: s1 [file s1]

## Supplementary Materials

**Table S1.** Changes of Pentacam parameters versus to pre-operation group.

|                               | Pre-op          | Week 2     |         | Week 4            |         | Week 8     |         |
|-------------------------------|-----------------|------------|---------|-------------------|---------|------------|---------|
|                               | Mean±SD         | Mean±SD    | P-value | Mean±SD           | P-value | Mean±SD    | P-value |
| Km F,D                        | 47.1±0.9        | 47.1±1.4   | 0.975   | 47.2±1.4          | 0.878   | 48.8±4.1   | 0.369   |
| Km B,D                        | -6±0.1          | -5.8±0.2   | 0.187   | -6.5±0.4          | 0.047   | -6.7±0.7   | 0.045   |
| Kmax F,D                      | 48.9±1.59       | 52.1±3.39  | 0.099   | 52.8±3.87         | 0.079   | 55.4±5.54  | 0.054   |
| CCT, µm                       | 373±18.9        | 244.4±56.6 | 0.002   | 244±45.8          | 0       | 289±40.0   | 0.003   |
| PCE, µm                       | 16.8±7.6        | 57.6±27.8  | 0.03    | 54.8±25.1         | 0.014   | 53±23.4    | 0.016   |
| C.Vol D 3mm, mm <sup>3</sup>  | 2.85 (2.6, 2.9) | 2.46±0.10  | 0.028   | 2.1±0.24          | 0.027   | 2.36±0.21  | 0.026   |
| C.Vol D 5mm, mm <sup>3</sup>  | 7.95±0.39       | 7.04±0.16  | 0.003   | 6.28±0.59         | 0       | 7.06±0.56  | 0.001   |
| C.Vol D 7mm, mm <sup>3</sup>  | 16.42±0.8       | 14.78±0.33 | 0.001   | 13.82±1.03        | 0.001   | 15.4±1.04  | 0.015   |
| C.Vol D 10mm, mm <sup>3</sup> | 36.5±1.37       | 34.04±1.5  | 0       | 33.1±1.69         | 0.003   | 36.96±2.47 | 0.551   |
| ISV                           | 22±8.36         | 46.2±17.15 | 0.04    | 52.5 (50, 69.55)  | 0.028   | 71.6±18.67 | 0.002   |
| IVA                           | 0.21±0.12       | 0.43±0.22  | 0.099   | 0.63 (0.54, 0.79) | 0.028   | 0.72±0.22  | 0.002   |
| IHD                           | 0.02±0.01       | 0.05±0.03  | 0.098   | 0.07 (0.05, 0.10) | 0.028   | 0.10±0.05  | 0.007   |

**Table S2.** Changes of SD-OCT parameters versus to pre-operation group.

|                     | Pre-op     | Week 2     |         | Week 4     |         | Week 8   |         |
|---------------------|------------|------------|---------|------------|---------|----------|---------|
|                     | Mean±SD    | Mean±SD    | P-value | Mean±SD    | P-value | Mean±SD  | P-value |
| CCT, µm             | 380.5±17.1 | 299.3±54.5 | 0.01    | 289.8±33.9 | 0       | 310±44.5 | 0.004   |
| CET, µm             | 48.1±3.8   | 57±11      | 0.073   | 48.1±6.9   | 1       | 61.3±4.8 | 0.001   |
| CCT 3mm annulus, µm | 382.7±16.7 | 312.7±36.5 | 0.003   | 304.7±32.2 | 0.001   | 325.2±30 | 0.003   |
| CET 3mm annulus, µm | 48.7±2.5   | 54±5.9     | 0.135   | 47.3±4.5   | 0.379   | 55.2±2.6 | 0.015   |

**Table S3.** Changes of Corvis ST parameters versus to pre-operation group.

|                             | Pre-op     | Week 2    |         | Week 4            |         | Week 8      |         |
|-----------------------------|------------|-----------|---------|-------------------|---------|-------------|---------|
|                             | Mean±SD    | Mean±SD   | P-value | Mean±SD           | P-value | Mean±SD     | P-value |
| IOP, mmHg                   | 13.67±2.78 | 12.9±4.61 | 0.748   | 14±2.57           | 0.852   | 15.2±1.91   | 0.39    |
| CCT, µm                     | 380.3±19.3 | 347±24.48 | 0.022   | 280.2±23.3        | 0       | 303.4±44.54 | 0.004   |
| A1V, m/s                    | 0.12±0.02  | 0.13±0.01 | 0.756   | 0.15 (0.13, 0.17) | 0.046   | 0.13±0.02   | 0.803   |
| HCR, mm                     | 4.39±0.49  | 3.81±0.08 | 0.048   | 3.81±0.60         | 0.141   | 3.84±0.44   | 0.039   |
| HC-PD, mm                   | 4.19±0.34  | 4.19±0.1  | 0.981   | 4.49±0.20         | 0.042   | 4.43±0.12   | 0.096   |
| A1 Defl Amp, mm             | 0.10±0.01  | 0.10±0.02 | 0.989   | 0.11±0.01         | 0.093   | 0.12±0.01   | 0.005   |
| HC Defl Amp, mm             | 0.70±0.09  | 0.72±0.05 | 0.691   | 0.90±0.07         | 0.001   | 0.85±0.06   | 0.014   |
| A2 Defl Amp, mm             | 0.12±0.01  | 0.12±0.01 | 0.14    | 0.14±0.03         | 0.307   | 0.18±0.1    | 0.211   |
| Defl Amp Max, mm            | 0.77±0.09  | 0.76±0.05 | 0.894   | 0.91±0.07         | 0.004   | 0.91±0.11   | 0.009   |
| InvRadMax, mm <sup>-1</sup> | 0.27±0.014 | 0.29±0.01 | 0.03    | 0.32±0.04         | 0.076   | 0.31±0.02   | 0.003   |

---

|                            |            |            |       |            |       |              |       |
|----------------------------|------------|------------|-------|------------|-------|--------------|-------|
|                            |            |            |       |            |       | 13.1         |       |
| <b>IR, mm<sup>-1</sup></b> | 12.14±0.87 | 13.61±1.11 | 0.013 | 15.24±1.89 | 0.007 | (12.64,14.3) | 0.046 |
| <b>DAR 2 mm</b>            | 4.17±0.34  | 4.62±0.14  | 0.008 | 5.41±0.94  | 0.028 | 4.75±0.66    | 0.153 |

---
